# Supplementary material for: Eosinophils and IL-4 Support Nematode Growth Coincident with an Innate Response to Tissue Injury
Source: PLoS Pathog. 2015 Dec 31;11(12):e1005347. doi: 10.1371/journal.ppat.1005347 (PMC4697774; doi:10.1371/journal.ppat.1005347)
Supplement: S2 Table — The fold change of each gene was expressed as the log2 value. (XLSX) [file ppat.1005347.s002.xlsx]

## Sheet: DiffGenes_PHILvsWT.day7
Symbols	EntrezID	naïve.WT.rep1	naïve.WT.rep2	2dpi.WT.rep1	2dpi.WT.rep2	2dpi.WT.rep3	7dpi.WT.rep1	7dpi.WT.rep2	7dpi.WT.rep3	naïve.PHIL.rep1	naïve.PHIL.rep2	2dpi.PHIL.rep1	2dpi.PHIL.rep2	2dpi.PHIL.rep3	2dpi.WT.rep3	7dpi.PHIL.rep1	7dpi.PHIL.rep2
2810416G20Rik	100040353	7.24026	7.2248	7.24764	7.14914	7.38741	7.15972	7.22311	7.05054	7.28737	7.29548	7.3053	7.29508	7.1477	7.2576	7.16087	7.17707
Smpdl3b	100340	8.65236	8.83437	9.30375	9.18338	9.08003	9.62745	9.50779	9.67733	8.97081	8.82412	9.4401	9.35312	9.09045	9.55079	9.58737	9.92584
Inpp5f	101490	8.00708	7.91214	8.19841	7.98526	7.98796	8.12957	8.0535	8.12515	7.87554	7.98479	8.06207	8.0941	8.08993	7.80228	8.05403	7.93574
Snx19	102607	7.41821	7.52315	7.3719	7.45784	7.46694	7.4252	7.52764	7.42089	7.5864	7.57657	7.3609	7.41463	7.32147	7.63912	7.55051	7.37473
Slc6a15	103098	7.30224	7.38591	7.21961	7.21005	7.22886	7.38086	7.29217	7.40354	7.41088	7.44992	7.28196	7.13885	7.29404	7.33697	7.32877	7.33598
Hoxb2	103889	8.24937	8.11281	8.15157	8.03911	8.20927	8.16397	7.98337	8.06044	8.29277	7.93113	8.02572	8.02112	8.0777	8.17267	7.9947	7.90132
Mycbpap	104601	7.18893	7.12001	7.19453	7.22904	7.32396	7.39482	7.42775	7.4487	7.25952	7.12518	7.13914	7.14784	7.17432	7.28943	7.33346	7.40364
Pik3r6	104709	7.87417	7.81798	7.77247	7.77476	7.56047	7.68761	7.74799	7.56899	7.88174	7.87257	7.54668	7.61862	7.73394	7.64016	7.57594	7.58437
Ano6	105722	7.15157	7.13846	7.33428	7.25455	7.14883	7.28643	7.29978	7.26126	7.16375	7.1498	7.28543	7.26689	7.2418	7.25314	7.28657	7.15344
Unc119b	106840	9.16395	9.22993	9.43753	9.31329	9.59347	10.1375	10.0443	9.98008	9.29872	9.44528	9.58285	9.50362	9.35402	9.88425	10.2341	10.1473
Exoc6	107371	9.84278	9.54013	9.47352	9.52649	9.36513	9.19144	9.28469	9.4091	9.61373	9.60066	9.41931	9.27926	9.38099	9.16131	9.14176	9.09741
Mrpl10	107732	11.415	11.6105	11.2239	11.2425	11.113	11.185	11.382	11.3449	11.4774	11.3916	11.1345	11.1104	11.2425	11.3694	11.2943	11.3587
Gtpbp6	107999	7.96604	8.09194	7.79534	8.10691	7.96469	7.84053	8.00555	8.08517	7.95874	8.00966	8.02785	7.90796	7.87895	8.02483	7.92518	7.96485
Card11	108723	7.12761	7.1955	7.24596	7.26787	7.32479	7.30744	7.3147	7.36941	7.1464	7.15976	7.39686	7.26872	7.34674	7.3916	7.46437	7.48568
Sobp	109205	7.56873	7.44241	7.62795	7.53728	7.5258	7.44935	7.54034	7.41422	7.40387	7.54767	7.48624	7.59518	7.50491	7.40228	7.45479	7.39336
Cbr3	109857	8.56317	8.40989	8.98521	8.69182	8.97176	8.75027	8.64373	8.57382	8.70981	8.84134	8.98631	8.77341	8.88509	8.75514	8.73202	8.80883
Ehmt2	110147	8.83998	8.8609	8.76005	8.56944	8.63888	8.63999	8.56354	8.75413	8.81061	8.73198	8.77352	8.70066	8.76039	8.80725	8.54935	8.62448
Fntb	110606	10.4898	10.5426	10.1556	10.1921	10.2524	10.6947	10.5531	10.7635	10.6207	10.5718	10.2314	10.1912	10.2572	10.8377	10.8465	10.7931
Acta1	11459	15.7949	15.491	15.5943	15.5755	15.5005	15.7072	15.7597	15.7445	15.5794	15.614	15.5622	15.5684	15.5855	15.6866	15.8317	15.541
Ehbp1l1	114601	10.1501	10.35	9.84037	10.0009	10.0072	9.81566	10.1238	9.78531	10.2242	10.2447	10.0212	10.1148	10.1082	10.4014	9.81995	9.7498
Rpl31	114641	12.9286	12.9112	13.3736	13.1693	13.3257	13.2434	13.0315	12.8238	13.1291	12.9083	13.348	13.2185	13.34	12.8916	13.0846	13.0818
Ak2	11637	9.08472	9.07594	9.18193	9.29322	9.33938	9.41806	9.35027	9.24957	8.94123	8.93	9.18664	9.42614	9.41979	9.26599	9.55836	9.42338
Aldh3a2	11671	10.1683	10.0854	10.1376	10.1291	10.2706	10.3609	10.234	10.2322	10.4428	10.3484	10.2238	10.1474	10.2789	10.4292	10.5271	10.4115
Aldoc	11676	7.2636	7.1816	7.31831	7.45357	7.30567	8.2535	8.26715	8.36602	7.29527	7.21861	7.41692	7.15777	7.33807	7.91594	8.1607	8.05291
Pop5	117109	10.5115	10.5644	10.4956	10.4922	10.4591	10.23	10.3119	10.2952	10.5421	10.4605	10.4638	10.4932	10.373	10.3735	10.4996	10.3221
Arf5	11844	8.26551	8.15409	7.99028	8.13182	8.11715	8.35086	8.21726	8.14479	8.04833	8.16939	8.0337	8.08446	8.11776	8.23883	8.11722	8.21409
Atp2b2	11941	7.186	7.1871	7.13401	7.11686	7.21821	7.40946	7.42961	7.52849	7.0768	7.09692	7.17915	7.06339	7.12297	7.32888	7.45575	7.27072
Atp8a1	11980	7.29492	7.26533	7.56609	7.45357	7.47207	7.38288	7.38956	7.34231	7.21956	7.40009	7.4469	7.40254	7.45793	7.32956	7.40226	7.34893
Bckdk	12041	10.4301	10.6674	9.85142	10.2441	10.021	9.98157	10.2185	10.3327	10.509	10.6136	10.1307	9.97646	10.0658	10.5748	10.095	10.0949
Bop1	12181	7.97537	7.96491	8.52345	8.57865	8.48708	8.17835	8.05737	7.95247	7.88526	7.91088	8.39041	8.4973	8.40849	7.8462	7.83311	7.93256
Ciita	12265	7.36382	7.29551	8.16841	8.08557	8.43371	8.38783	7.96815	8.01557	7.43541	7.37513	8.13919	8.43046	8.18882	8.2496	8.33006	8.46843
Cacna2d3	12294	7.39351	7.5456	7.48586	7.44314	7.33464	7.43178	7.38166	7.41198	7.56972	7.65418	7.51937	7.38621	7.58667	7.42329	7.43624	7.43206
Cacnb1	12295	8.63015	8.68389	8.87383	8.60959	8.70141	8.39309	8.2775	8.20647	8.51108	8.59587	8.68945	8.68285	8.48948	8.39076	8.15649	8.10138
Cacnb4	12298	7.96519	8.00955	7.83949	7.91127	7.89751	7.77862	7.78602	7.80154	8.10413	8.03119	8.03264	7.84639	8.10155	7.77441	7.84602	7.87242
Cacng1	12299	8.26684	8.35142	9.1028	9.61563	9.44632	8.19522	8.13735	8.17488	8.00834	8.07586	9.34596	9.23271	9.40443	8.0892	8.12514	8.06589
Ddr1	12305	8.79305	8.84079	8.71291	8.59462	8.80108	9.01529	9.01897	9.12402	8.66248	8.94892	8.69355	8.65293	8.64394	9.00664	9.00865	8.78745
Calca	12310	7.4831	7.31957	7.49372	7.48432	7.49311	7.60755	7.53097	7.5467	7.31803	7.37404	7.38388	7.47929	7.49072	7.62514	7.54177	7.48413
Calm3	12315	12.3332	12.2465	12.017	12.206	12.0682	12.1776	12.4993	12.3867	12.3955	12.2913	12.2109	12.155	12.3088	12.2353	12.323	12.2195
Capg	12332	8.78646	8.57584	9.60812	9.52049	9.72442	9.36286	9.32601	9.18728	9.00192	8.82964	9.81359	9.75747	9.70693	9.43878	9.29294	9.66306
Cav2	12390	8.37717	8.2032	7.93253	8.08039	7.96937	7.9737	8.14681	8.00766	8.41488	8.35977	7.98354	8.05519	8.01771	7.98834	8.04787	7.94996
Cav3	12391	9.27388	9.37225	9.1112	9.11308	9.15685	9.01994	9.03331	8.92871	9.43445	9.03666	9.01205	9.00652	9.1025	9.13483	8.68191	9.00426
Cd151	12476	11.0125	11.0121	11.3944	11.412	11.3021	11.0535	11.0519	10.8006	10.9995	10.9862	11.3575	11.4007	11.1111	10.9501	10.9696	10.8519
Cd68	12514	7.89147	7.73431	9.41239	9.37288	9.31799	9.07536	8.80899	8.75582	8.15183	8.17886	9.45777	9.60106	9.53896	9.29726	8.93413	9.20987
Cdc25a	12530	7.92448	7.92947	7.96195	7.86694	8.03444	7.76196	7.88092	7.77598	7.90274	7.89427	7.99991	7.81951	8.02659	7.84757	7.81051	7.81582
Cdk1	12534	7.39104	7.34713	7.67981	7.67312	7.67053	7.9837	7.85687	7.81334	7.53478	7.34157	7.7504	7.64375	7.8574	7.91725	7.93935	7.95232
Cdh11	12552	7.25066	7.15262	7.28011	7.29832	7.147	7.40849	7.14989	7.24547	7.06972	7.3632	7.14739	7.18834	7.23275	7.22499	7.23511	7.30543
Cdyl	12593	7.58722	7.68349	7.42513	7.59093	7.63648	7.7705	7.85117	7.80323	7.51193	7.61494	7.54522	7.51735	7.56267	7.86662	7.70928	7.77095
Cish	12700	11.7105	10.9139	9.88806	9.12871	10.004	9.707	11.1371	9.7946	10.4084	10.7824	9.05398	9.62871	9.36388	10.2898	9.9015	11.0126
Clk1	12747	8.05712	7.67674	8.13593	8.10573	7.93361	7.88882	7.76486	7.70072	7.45873	7.76241	7.99011	7.99224	7.86483	7.52187	7.6018	7.69606
Hps3	12807	8.7913	8.8383	8.93138	8.96833	8.98806	9.27268	9.16051	9.13591	8.92014	8.96924	8.95867	9.11034	9.00948	9.21774	9.2748	9.37079
Pcyt1a	13026	9.37204	8.98173	9.86139	9.28882	9.64882	8.72209	8.94699	8.66868	8.93299	9.15477	9.18737	9.20948	9.26189	8.32172	8.50489	8.38724
Cttn	13043	7.20618	7.17348	7.29893	7.33813	7.41219	7.31764	7.43944	7.30063	7.2164	7.25981	7.392	7.21755	7.2599	7.42878	7.26591	7.34587
Cux1	13047	9.37949	9.54673	9.01051	9.09566	9.07634	9.09108	9.22846	9.44844	9.40244	9.47825	8.98603	9.05238	9.07232	9.63469	9.29991	9.31271
Cycs	13063	8.58762	8.49397	8.07842	8.28097	8.22816	8.01696	8.17207	8.18854	8.50212	8.60294	8.32108	8.36694	8.29769	8.044	8.02199	8.00311
Cyp2c37	13096	7.09011	7.10835	7.29241	7.00103	7.13232	7.17724	7.21998	7.20359	7.08303	7.13532	7.33924	7.5356	7.21827	7.08084	7.19471	7.14028
Dab1	13131	7.16637	7.25158	7.27928	7.2298	7.15248	7.19274	7.35738	7.05803	7.10188	7.13374	7.2558	7.12914	7.22279	7.17976	7.194	7.25063
Twist2	13345	7.58147	7.40145	7.43999	7.58983	7.53908	7.52653	7.46823	7.43573	7.75177	7.66476	7.60693	7.55645	7.55737	7.65299	7.59294	7.52862
Diap1	13367	7.96348	7.97473	7.94152	8.19125	7.89423	7.91023	8.05995	7.89231	8.03359	8.02691	8.03582	7.95233	7.88505	8.02893	7.96632	8.02364
E2f3	13557	7.47339	7.55831	7.73416	7.82224	7.78716	7.53875	7.54089	7.59754	7.55402	7.52569	7.6723	7.7693	7.69708	7.63344	7.54789	7.54535
Edn1	13614	8.03477	8.12476	8.20637	8.09034	8.14512	7.78596	7.59269	7.77727	8.20044	8.35002	8.16857	8.1419	8.14506	7.8792	7.8958	7.98002
Epha3	13837	8.02993	7.89213	7.91868	7.95088	8.04238	8.33497	8.34209	8.4569	8.05909	8.02691	8.09197	7.92609	8.07556	8.31348	8.34385	8.22156
Ext2	14043	9.9405	9.80413	10.1158	9.87955	10.0338	9.81542	9.92444	9.8295	9.89292	9.8119	9.95302	10.0925	9.87162	9.79892	9.85098	9.70838
Fes	14159	8.40908	8.02622	8.63382	8.42691	8.63523	8.70033	8.6886	8.40387	8.39653	8.22145	8.65905	8.77924	8.59662	8.56123	8.55169	8.59371
Fgf1	14164	10.2392	10.4718	9.66789	10.0572	9.44957	9.97798	10.1364	10.0348	10.4316	10.466	9.69098	9.58283	9.67816	10.242	10.1206	9.95994
Fgf10	14165	7.43423	7.63246	7.42513	7.58433	7.50528	7.68243	7.65919	7.61443	7.58861	7.65321	7.62232	7.61108	7.49467	7.61628	7.55875	7.55751
Fnbp1	14269	7.57453	7.39812	7.47867	7.44622	7.58356	7.6896	7.74899	7.79348	7.45873	7.57963	7.60622	7.63632	7.61687	7.72413	7.65963	7.74221
Fpgs	14287	7.72648	7.82227	7.47651	7.52353	7.43648	7.44385	7.6946	7.61537	7.64914	7.731	7.55398	7.37795	7.61468	7.55497	7.57722	7.56427
Fth1	14319	14.078	13.8669	14.6881	14.3828	14.4316	14.4985	14.1923	14.2651	14.0559	14.0103	14.5484	14.571	14.3401	13.904	14.1538	14.0628
Gdap1	14545	7.77303	7.86021	7.43777	7.47055	7.38897	7.50604	7.59003	7.53196	7.78932	7.95258	7.47247	7.43371	7.45469	7.58407	7.56737	7.41323
Mrps33	14548	12.0588	12.3177	11.9721	11.9515	11.9853	12.0434	12.1401	12.2161	12.2415	12.2954	12.0851	11.9061	12.0397	12.0509	12.0216	12.1997
Gsta4	14860	9.77465	9.96497	9.75192	9.82036	9.70845	9.30176	9.53536	9.50368	9.86179	9.97383	9.90663	9.75464	10.0143	9.55897	9.4021	9.57533
Gys1	14936	7.95835	7.93571	7.56745	7.7167	7.63908	7.6108	7.71186	7.70696	7.90966	7.89665	7.69768	7.81951	7.6741	7.68292	7.76656	7.86338
Hap1	15114	7.58492	7.43578	8.32738	8.07359	8.62291	7.5316	7.56916	7.4041	7.63533	7.38815	8.53649	8.55197	8.24331	7.55388	7.53562	7.63684
Has1	15116	7.38362	7.26214	7.44515	7.64373	7.62605	7.54754	7.45994	7.42971	7.24746	7.25158	7.55616	7.51882	7.44901	7.37825	7.43177	7.50863
Hba-a1	15122	14.0828	13.8286	13.4597	13.7241	13.406	13.2315	13.5303	13.7685	14.027	13.8342	14.1416	14.4909	14.177	14.1703	13.926	14.066
Ptpn6	15170	7.76905	7.57825	8.70065	8.60283	8.61788	8.77093	8.39585	8.56407	7.88965	7.78524	8.78478	8.90169	8.78407	8.73966	8.70574	9.11376
Hdac2	15182	9.9934	9.7919	10.2839	10.2824	10.0827	10.3089	10.2852	10.1111	9.81328	9.99887	9.97581	10.166	9.93627	9.45306	9.93258	9.70332
Hdac3	15183	10.6905	10.5226	10.5011	10.4258	10.4823	10.6588	10.5409	10.68	10.5206	10.5917	10.4615	10.5886	10.4635	10.2188	10.4951	10.3393
Hdac5	15184	9.58346	9.67161	9.09557	9.14302	9.07214	9.19488	9.26431	9.33975	9.51319	9.38363	9.30886	9.22891	9.17713	9.47308	9.26672	9.26766
Hdac6	15185	7.28399	7.3593	7.29404	7.26861	7.16885	7.19924	7.21842	7.1612	7.19465	7.14653	7.29842	7.14292	7.15213	7.32277	7.28466	7.17933
Hdgf	15191	9.1759	9.19784	9.22507	9.1436	9.38565	8.84613	8.98115	9.08331	9.24669	9.2205	9.15987	8.94596	9.27144	8.97232	8.90179	8.91139
Hey2	15214	7.55356	7.49068	7.43257	7.27374	7.32231	7.32545	7.27359	7.49579	7.30434	7.36212	7.32151	7.24304	7.18056	7.28872	7.47477	7.37944
Hipk2	15258	8.09222	8.2318	7.8658	7.85311	7.74909	7.80478	8.02575	7.97337	7.94455	8.03757	7.87382	7.69021	7.94237	8.01496	7.9509	7.93455
Hmox2	15369	9.67925	9.8433	9.50096	9.76507	9.72505	9.63045	9.65335	9.59396	9.78641	9.75447	9.6381	9.84782	9.68231	9.62189	9.47254	9.60788
Hoxc9	15427	7.30469	7.34491	7.41388	7.39392	7.57816	7.70389	7.74949	7.80238	7.47615	7.35779	7.38062	7.35277	7.36992	7.76294	7.71772	7.66575
Hsp90ab1	15516	9.12849	9.08661	9.95183	9.85869	9.56703	9.28703	9.03137	8.97394	9.15265	9.0607	9.56346	9.85063	9.41289	9.10623	8.82981	9.00637
Ifna1	15962	7.69306	7.62139	7.55039	7.49968	7.60761	7.47857	7.598	7.45618	7.61921	7.62684	7.71938	7.53704	7.69915	7.48844	7.52411	7.47008
Ifngr2	15980	9.49826	9.50139	9.40417	9.32003	9.26736	9.15464	9.27031	9.16956	9.48699	9.2968	9.55347	9.33106	9.27477	9.23596	9.0061	9.05358
Igfals	16005	8.48851	8.33837	7.97901	8.03583	8.05666	7.73267	7.85971	7.79646	8.19361	8.38221	8.09452	8.04426	8.05236	7.96257	7.94513	7.84058
Cyr61	16007	7.33294	7.62744	7.62535	7.54863	7.55978	7.60471	7.68541	7.87695	7.74589	7.7319	7.67566	7.61999	7.58815	7.74413	7.7697	7.68435
Igfbp4	16010	10.3577	10.2846	9.98305	10.5433	10.3341	11.1378	10.8499	10.8184	10.7431	10.4373	10.8197	10.5291	10.7075	11.2998	11.1369	11.0601
Igfbp6	16012	9.78407	10.0384	9.94966	9.97567	10.1641	9.35913	9.47898	9.32191	9.97294	10.4235	10.3757	9.73166	9.96666	9.97698	9.37999	9.80619
Il1r2	16178	7.17091	7.2579	7.12764	7.20471	7.11568	7.25702	7.34908	7.37236	7.21011	7.20051	7.18475	7.35022	7.25357	7.30348	7.2853	7.36703
Irak1	16179	7.39227	7.25684	7.27433	7.35103	7.47791	7.39087	7.31322	7.20991	7.2717	7.42179	7.28283	7.32609	7.3852	7.33964	7.24326	7.40478
Itga5	16402	7.68988	7.72692	7.71339	7.74972	7.68946	7.91353	8.01918	8.01932	7.94707	7.70621	7.63479	7.61177	7.74468	8.23883	8.08488	8.12013
Eif6	16418	10.2347	10.1692	10.8289	10.8888	10.8191	10.2933	10.5231	10.4177	10.0898	10.242	10.8191	10.9167	10.7544	10.5447	10.6228	10.7147
Cuzd1	16433	7.69623	7.91055	7.54213	7.48134	7.50813	7.49087	7.52653	7.44169	7.72412	7.74725	7.60341	7.51071	7.53675	7.67334	7.46294	7.54144
Lig3	16882	8.77406	8.99379	8.73374	8.73503	8.69377	8.45372	8.62912	8.69117	8.8671	8.96626	8.48401	8.56543	8.66884	8.70986	8.52318	8.72909
Lox	16948	8.30882	8.31405	8.89474	9.08149	9.17378	11.1171	10.7167	10.7528	8.51632	8.57803	8.82711	9.01178	9.1531	10.508	10.4406	10.5537
Loxl1	16949	11.3093	10.9748	11.4272	11.4874	11.5791	12.0701	11.8391	12.1231	11.3069	11.2334	11.699	11.3562	11.5045	12.0549	12.077	11.8813
Ltc4s	17001	8.00212	7.84602	7.85242	7.79796	7.85547	7.69159	7.85022	7.72336	7.93951	7.74275	8.03317	7.70323	7.79598	7.83705	7.70121	7.72547
Slc2a10	170441	7.49158	7.66801	7.37268	7.51312	7.53141	7.71575	7.69052	7.81922	7.54385	7.63765	7.48471	7.57771	7.46116	7.74801	7.79776	7.63036
Pdzd3	170761	8.0468	8.23719	8.11357	8.00384	8.13074	7.86348	7.74051	7.82424	8.24978	8.30512	8.18209	8.29358	8.05508	8.14772	7.81474	7.66667
Hook2	170833	7.18023	7.32506	7.31831	7.15771	7.29219	7.37682	7.14437	7.25029	7.24311	7.20425	7.24188	7.15031	7.17076	7.1856	7.2789	7.15652
Mxd3	17121	7.15929	7.14506	7.16102	7.17013	7.25084	7.24487	7.30579	7.32304	7.36422	7.08553	7.13468	7.23389	7.21105	7.27151	7.36858	7.32847
Vmn1r197	171278	7.16999	7.28791	7.26188	7.16005	7.12956	7.19924	7.28987	7.08471	7.22698	7.18675	7.31641	7.19182	7.30027	7.22732	7.12451	7.10471
Slc12a8	171286	7.37372	7.48196	7.41463	7.48074	7.50457	7.52483	7.53814	7.54817	7.40387	7.51091	7.54302	7.35954	7.4804	7.59417	7.59167	7.6621
Mep1b	17288	7.24601	7.25896	7.24174	7.17939	7.37166	7.28703	7.32202	7.36526	7.40503	7.25466	7.31641	7.43921	7.24452	7.39224	7.39441	7.19502
Foxk1	17425	7.39598	7.51993	7.42363	7.48432	7.56389	7.49913	7.55292	7.62468	7.25074	7.57657	7.46322	7.51071	7.40034	7.62045	7.58488	7.60093
Mt1	17748	13.6326	13.796	14.5768	14.5178	14.6098	14.3803	14.4153	14.5895	13.8947	13.9624	14.2437	14.4499	14.4282	14.4462	14.7234	14.8825
Myo5a	17918	7.67494	7.45233	7.62795	7.61594	7.6462	8.13024	8.06124	8.02119	7.44474	7.55079	7.52086	7.60557	7.65218	7.89168	8.17261	8.01303
Myo7a	17921	7.80637	7.88402	7.91975	7.62669	7.82486	8.16036	8.03924	8.045	7.99391	7.80766	7.86079	7.81649	7.8178	8.19835	8.05232	8.04508
Myod1	17927	7.42807	7.31189	7.70847	7.72778	7.71804	7.73659	7.56916	7.5608	7.4912	7.44344	7.52532	7.5276	7.63427	7.63964	7.66907	7.50155
Ncf4	17972	7.65765	7.56148	8.37339	8.2192	8.59079	8.69861	8.45184	8.49104	7.78266	7.78871	8.56205	8.63064	8.62674	8.67536	8.69077	9.08287
Nedd9	18003	9.31368	9.19948	9.27213	9.00997	9.17147	9.82975	9.98459	9.98911	9.33393	9.20519	9.04622	9.13112	9.34114	9.88785	10.1773	9.99617
Nfs1	18041	10.126	10.3529	9.93714	10.1655	9.9056	9.77958	9.84273	9.95278	10.2841	10.2287	9.88948	9.92122	9.97656	9.9051	9.60381	9.66375
Nras	18176	10.7639	10.4317	10.9882	11.0432	10.9129	10.9982	11.1402	11.1249	10.6564	10.6332	11.0129	10.9283	11.0461	10.9125	11.312	11.2287
Ntn3	18209	7.87692	7.97848	7.62991	7.63789	7.62474	7.71101	7.64728	7.69133	7.85318	7.91009	7.70955	7.60557	7.76	7.84163	7.72933	7.6839
Sqstm1	18412	11.8594	12.1242	12.2974	12.5054	12.5855	12.1526	12.2052	12.2937	12.1587	12.0711	12.2305	12.251	12.4129	12.3798	12.2999	12.5589
Mybbp1a	18432	10.8011	10.6075	10.8836	10.8001	10.7212	10.4638	10.4897	10.4027	10.6123	10.621	10.7912	10.8729	10.8099	10.3535	10.4067	10.3748
Pcmt1	18537	11.0239	11.2272	10.5395	10.9041	10.5861	10.8103	10.907	10.9163	10.9834	10.9594	10.6005	10.6045	10.6814	11.0376	10.9194	10.8391
Pik3r3	18710	8.45403	8.43978	7.91385	8.46422	8.1621	8.73564	8.55115	8.33448	8.43015	8.30342	8.20309	8.31302	8.08463	8.64626	8.44495	8.38261
Pim2	18715	7.16908	7.17081	7.33269	7.33402	7.18871	7.26702	7.28757	7.2633	7.28175	7.24547	7.37407	7.19971	7.24361	7.36209	7.23238	7.35502
Prkch	18755	8.06265	8.17196	7.73112	7.67676	7.7593	7.79173	7.90237	8.01068	8.07655	8.1242	7.69635	7.82372	7.86852	8.00834	7.94658	7.9989
Ppp3cb	19056	12.4802	12.5596	12.2703	12.2591	12.1003	12.1237	12.3187	12.2418	12.424	12.5429	12.1241	12.1898	12.176	12.267	12.2475	12.0857
Mob4	19070	7.55824	7.58761	7.70476	7.53328	7.79536	7.66726	7.47117	7.54573	7.6815	7.84387	7.54082	7.66781	7.69501	7.50895	7.46817	7.46851
Prkag1	19082	10.5377	10.5265	9.83217	9.86346	9.91065	10.0764	10.2376	10.0177	10.4504	10.4558	10.0064	10.001	10.0038	10.0958	10.0395	10.2098
Mapk8ip1	19099	7.6257	7.59484	7.44147	7.53042	7.51735	8.0138	7.99715	8.05237	7.65757	7.65707	7.55034	7.50479	7.54442	7.88812	8.14153	8.06552
Dicer1	192119	8.44135	8.3595	8.23993	8.3087	8.33226	8.32652	8.48242	8.42203	8.21801	8.42382	8.21065	8.34517	8.25141	8.55354	8.37858	8.46019
Flna	192176	8.59378	8.41654	8.6252	8.88736	8.61385	9.13656	9.00868	8.86647	8.71204	8.51577	8.50894	8.62814	8.50356	8.79457	8.94191	8.80429
Nadk	192185	10.2336	10.3124	10.4812	10.4009	10.4473	10.7956	10.5974	10.4947	10.3221	10.4044	10.4538	10.4855	10.4636	10.6284	10.8825	10.7958
Prom2	192212	7.14006	7.12954	7.1954	7.13897	7.10078	7.24227	7.31691	7.36645	7.05914	7.13217	7.19776	7.18058	7.21376	7.2873	7.26853	7.28023
Abcg4	192663	7.46119	7.43246	7.33586	7.3292	7.26043	7.41427	7.47994	7.42256	7.52224	7.4693	7.35593	7.37795	7.4482	7.29789	7.32344	7.42381
Rgl2	19732	10.3346	10.2103	9.68388	9.81262	9.69701	9.85506	9.90793	9.69991	10.2488	10.0856	9.77288	9.66065	9.71153	9.58388	9.77335	9.78661
Sart1	20227	8.38991	8.35843	8.18594	8.32102	8.18565	7.95032	8.36226	8.14932	8.30343	8.40059	8.28427	8.23653	8.26417	8.27094	8.17614	8.20385
Ccl11	20292	8.93462	8.72878	8.50771	9.01488	8.79215	9.34806	8.54854	8.48564	8.86671	9.04043	8.79659	8.7969	8.67277	8.95406	8.53893	8.91362
Ccl4	20303	7.19289	7.35044	8.44489	8.24915	8.48782	8.72112	8.15622	8.49076	7.45174	7.27542	8.21207	8.58429	8.1188	8.62004	8.88028	9.31975
Ccl9	20308	9.14245	9.10801	10.9783	10.5473	11.0896	11.0532	10.6794	10.57	9.62521	9.59769	10.9446	10.6695	10.9133	11.2336	10.9024	11.1753
Cxcl12	20315	11.3765	11.5271	10.6709	10.8652	10.436	10.8168	10.7715	10.5293	11.6759	11.5279	10.7962	10.951	10.8629	10.7626	10.7914	10.5192
Sema4a	20351	9.22048	9.10626	10.0298	9.70071	9.98222	10.5796	10.1637	10.2465	9.18677	9.36699	10.0839	10.0775	10.1136	10.6787	10.6737	10.8569
Sema6b	20359	7.83318	7.88565	7.59302	7.66844	7.60893	7.53244	7.64676	7.72776	7.70095	7.72279	7.59846	7.60833	7.77581	7.66675	7.60475	7.62339
Sh2b1	20399	7.73163	7.84434	7.73295	7.88745	7.7581	7.75924	7.85924	7.82633	7.59302	7.70621	7.6251	7.69282	7.82353	7.84209	7.80665	7.83724
Slc1a3	20512	9.99212	9.37369	9.71472	9.22247	9.80446	9.34609	9.10508	8.93537	9.25183	9.13697	9.44581	9.51484	9.47841	9.20007	9.69578	9.62664
Kdm5d	20592	7.32309	7.28899	7.30622	7.46512	7.2368	7.19419	7.30129	7.30258	7.21325	7.08132	7.17518	7.17801	7.1071	7.1764	7.1616	7.29559
Sp4	20688	7.47217	7.35044	7.49301	7.50203	7.54532	7.43318	7.45036	7.36407	7.23663	7.54663	7.55762	7.4876	7.5275	7.23272	7.36472	7.24642
Cetn4	207175	7.46119	7.3848	7.53174	7.55483	7.59497	7.81586	7.63427	7.66785	7.37236	7.63569	7.7908	7.62545	7.62051	7.78248	7.69108	7.80778
Serpinb6a	20719	11.9058	11.6139	12.8604	12.8158	13.0066	12.4595	12.4308	12.3513	11.8959	11.8153	12.8108	12.702	12.8447	12.2562	12.3434	12.3394
Zbtb7c	207259	7.42191	7.67093	7.83892	7.72427	7.87885	8.09934	8.14804	8.09166	7.50389	7.74545	7.8602	7.77489	7.89718	8.21963	8.24995	8.11114
Ankrd33	208258	7.15929	7.13682	7.26105	7.14445	7.1314	7.21405	7.24757	7.17751	7.25402	7.3351	7.15728	7.13075	7.11063	7.07424	7.17827	7.27413
Stat1	20846	8.15517	8.2632	11.2086	10.7231	11.1993	9.45312	8.84492	9.241	8.22336	8.21109	11.0715	11.4524	11.3307	10.2888	9.27299	9.71765
Proser1	212127	9.21052	9.30442	8.76611	8.72674	8.53541	8.91284	9.03765	8.92655	9.05701	9.17005	8.71319	8.83099	8.91869	8.97979	8.9941	9.18182
Dnd1	213236	7.75401	7.6806	7.33666	7.47955	7.51594	7.53412	7.54034	7.4636	7.61488	7.70992	7.55398	7.43055	7.50804	7.59311	7.62651	7.67122
Tagln	21345	7.45875	7.55831	7.33507	7.36443	7.26216	8.48289	8.34982	8.33916	7.4249	7.44128	7.4017	7.28423	7.25809	8.21707	8.22547	8.21477
Tarbp2	21357	8.67515	8.52083	8.3371	8.29525	8.39988	8.33858	8.41365	8.3276	8.51945	8.66476	8.28382	8.53117	8.19673	8.32582	8.37858	8.44923
Dync2li1	213575	8.479	8.44227	8.47902	8.40484	8.57187	8.46808	8.45254	8.36172	8.55543	8.58385	8.61584	8.45866	8.55894	8.43766	8.19654	8.45694
Arrb2	216869	8.03879	7.89776	8.23993	8.27817	8.36804	8.42236	8.35824	8.4353	8.07353	8.07449	8.34455	8.24251	8.41191	8.59799	8.6228	8.63009
Dnajc27	217378	9.83375	10.0198	9.37825	9.52064	9.21919	9.20154	9.39613	9.47826	9.65934	9.81756	9.40932	9.35814	9.31481	9.75234	9.28985	9.19246
Tia1	21841	8.1733	8.17639	8.24381	8.35504	8.26482	7.9837	8.02662	8.0309	8.28328	8.33303	8.17776	8.28243	8.03377	8.044	7.96382	8.09048
Tlr1	21897	7.30469	7.2579	7.53867	7.42197	7.30651	7.45618	7.43822	7.36526	7.31575	7.25569	7.40491	7.47777	7.37843	7.34498	7.45044	7.41267
Dtymk	21915	8.35003	8.56782	8.36509	8.29352	8.45446	8.16725	8.23378	8.21286	8.43352	8.43096	8.34282	8.3209	8.49352	8.24243	8.32415	8.26605
Rpl13a	22121	9.12198	9.04829	9.9602	9.77546	9.81958	9.68808	9.37106	9.45697	9.18866	9.21329	9.8413	9.84077	9.86273	9.47324	9.4918	9.50837
Ttn	22138	14.9807	14.9357	14.8449	15.0207	14.7089	14.8817	14.8794	14.7511	14.788	14.8948	14.6655	14.647	14.7953	14.7744	14.7052	14.6778
Txn1	22166	7.30714	7.28034	7.68608	7.54354	7.74607	7.54294	7.54309	7.53689	7.36655	7.27542	7.61744	7.45633	7.64504	7.29789	7.49428	7.45368
Vmn1r45	22297	7.6803	7.57198	7.50083	7.47895	7.49455	7.54754	7.49609	7.49681	7.63959	7.86525	7.55107	7.62341	7.62922	7.47223	7.49106	7.57722
Eif2b5	224045	10.754	10.9383	10.9443	10.8943	10.9444	10.47	10.5339	10.6171	10.9047	10.936	10.781	10.8349	10.6991	10.7178	10.6282	10.5474
Wnt7b	22422	7.16727	7.18618	7.24764	7.30046	7.18421	7.17423	7.28833	7.27009	7.38052	7.27333	7.17203	7.13156	7.31796	7.43242	7.27049	7.31513
Pik3c3	225326	10.0114	9.949	9.58522	9.77103	9.77499	9.49502	9.70302	9.55285	9.91196	9.85863	9.71232	9.6926	9.67383	9.55403	9.56927	9.66812
Ticam2	225471	7.35146	7.28358	7.53521	7.55989	7.74245	7.76313	7.53207	7.57857	7.44241	7.35454	7.62301	7.748	7.75402	7.5846	7.64767	7.71216
Tor4a	227612	7.76306	7.61633	8.07071	8.01846	8.30763	8.04523	7.92499	7.84625	7.81841	7.68942	8.21301	8.23283	8.22795	8.01083	8.07442	8.03984
Exosc2	227715	8.69423	8.8637	8.80427	8.94572	8.89918	8.97834	8.76995	8.94223	8.82415	8.86622	8.83797	8.84682	8.90535	8.9293	8.963	9.11141
Amigo1	229715	8.17976	8.10679	8.03698	8.18642	8.1807	7.88288	7.8856	7.94036	8.17568	8.15024	8.07967	8.12811	8.06481	7.87022	7.82164	7.85678
Cep104	230967	8.89587	8.94127	8.77093	8.6555	8.87088	8.42466	8.6496	8.63473	8.92658	9.14779	8.77642	8.68044	8.81744	8.78896	8.64797	8.6846
Cox18	231430	8.7913	8.93038	8.96687	8.93247	8.97677	8.72209	8.54723	8.73521	8.7852	8.97912	8.86402	8.96062	8.95421	8.72643	8.71188	8.64309
Scaf1	233208	8.25275	8.59609	7.93253	7.98398	7.87498	8.09934	8.38545	8.43706	8.23664	8.42177	8.05686	8.08649	8.15118	8.59394	8.31972	8.26737
Vps33b	233405	7.93063	7.96718	7.92082	8.06514	8.18205	7.99082	8.13694	8.07685	7.98419	8.04251	8.08992	8.15021	8.09152	7.96597	8.08521	7.99314
Brip1	237911	7.43914	7.34823	7.39647	7.48193	7.60496	7.51888	7.5243	7.41756	7.39919	7.40009	7.48395	7.5756	7.61029	7.53189	7.56737	7.55557
Ash2l	23808	9.33213	9.37586	9.24158	9.27892	9.27728	9.03163	9.05611	9.33086	9.45402	9.29575	9.24413	9.24077	9.14819	9.29909	9.07861	9.16447
Arid4a	238247	7.30224	7.2319	7.33428	7.25753	7.20842	7.31932	7.22703	7.2551	7.1618	7.16399	7.23842	7.35785	7.19218	7.16365	7.29789	7.16264
Irf2bpl	238330	10.0123	9.72476	10.3484	10.2656	10.2614	10.3878	10.2497	10.1346	9.64353	9.70273	9.88468	10.2996	10.2089	9.81318	10.0842	9.65194
Phf20l1	239510	7.8379	7.67771	7.73477	7.67104	7.8174	7.61405	7.60117	7.59424	8.05295	7.81107	7.71545	7.71229	7.69154	7.66523	7.6625	7.56812
Pcyox1l	240334	7.49279	7.45453	7.46492	7.67364	7.58491	8.00463	8.00025	7.79136	7.49005	7.60294	7.47477	7.52541	7.4676	7.98288	7.86262	7.97031
Mpdu1	24070	7.46852	7.51885	7.34061	7.39651	7.45736	7.48999	7.47703	7.31798	7.2784	7.44128	7.46477	7.40901	7.47401	7.26276	7.44703	7.36643
Tor1aip2	240832	8.28472	8.32738	8.2558	8.04729	8.21853	7.83448	7.83159	7.96063	8.14757	8.20803	8.18497	8.29536	8.09681	7.91418	7.93282	7.93256
Wdr78	242584	7.35269	7.29442	7.54351	7.60076	7.5342	7.49479	7.44249	7.44115	7.51881	7.57452	7.60622	7.53994	7.54365	7.39727	7.60979	7.55606
Podn	242608	8.27017	8.31461	7.89601	8.04116	7.86442	8.00534	7.92178	7.96256	8.36432	8.49573	8.38706	7.92214	7.99585	7.92945	7.78533	7.85388
Zfp277	246196	10.0542	10.076	10.1112	9.87472	10.1695	9.86856	9.78778	9.85183	10.0098	9.96566	10.2963	10.0136	10.1505	9.84805	9.7669	9.88789
Irak4	266632	7.42191	7.49612	7.4296	7.46331	7.65713	7.49435	7.39347	7.38173	7.54725	7.44236	7.48395	7.57981	7.6479	7.58886	7.59885	7.54633
Sntg2	268534	7.2437	7.41808	7.24005	7.36509	7.26216	7.40801	7.36012	7.36407	7.24965	7.32111	7.27237	7.19531	7.32059	7.38399	7.45382	7.44887
Cpsf7	269061	10.1971	10.0656	10.2669	10.282	10.1513	10.1905	10.2078	10.0796	10.338	10.2301	10.1593	10.0903	10.2685	10.0497	10.2438	10.1822
Fbxl4	269514	8.45518	8.32794	8.391	8.56539	8.21501	8.37726	8.27826	8.41014	8.1984	8.32417	8.16566	8.15021	8.3087	8.04967	8.25886	8.0633
Idh2	269951	9.95754	10.018	10.1818	10.2396	10.0811	9.99013	10.1154	9.7761	10.1044	10.1016	10.149	10.2438	10.2924	9.17447	9.62689	9.47825
Mbtps2	270669	7.20723	7.19929	7.40406	7.46875	7.43799	7.33151	7.34418	7.33677	7.18053	7.25158	7.392	7.23115	7.36992	7.25091	7.28147	7.19502
B9d1	27078	8.91838	8.78066	8.72817	8.66933	8.83943	8.26664	8.36845	8.3706	8.72446	8.84643	9.0115	8.84466	8.79397	8.62373	8.33946	8.40988
BC048403	270802	7.1261	7.09018	7.15655	7.25158	7.15157	7.239	7.13754	7.2092	7.13411	7.06342	7.18636	7.09199	7.27882	7.20682	7.09862	7.08368
Tcl1b2	27381	7.38238	7.30751	7.26188	7.33264	7.32231	7.23372	7.22939	7.27615	7.18755	7.15062	7.17518	7.15694	7.29226	7.20842	7.27373	7.33598
Shroom3	27428	7.26717	7.4214	7.47867	7.43509	7.54394	7.66886	7.67516	7.66831	7.33412	7.49818	7.45314	7.41142	7.64003	7.72266	7.64932	7.59432
Gpr107	277463	9.24177	9.10364	9.25596	9.13225	9.08101	9.23708	9.23565	9.33564	9.11639	9.19621	9.14266	9.29438	9.31596	9.34999	9.39146	9.22124
Commd8	27784	7.935	8.06374	7.86191	7.72175	7.78599	7.93291	8.00511	7.91908	8.11368	8.02262	7.699	7.77427	7.76528	7.86572	7.96632	7.90293
Ndrg2	29811	10.1327	10.0179	10.166	10.1157	10.2533	10.1353	10.0447	9.69004	10.1576	10.2887	9.78728	9.99268	9.93748	9.79391	9.66938	9.53554
Zfp750	319530	7.2414	7.39923	7.39113	7.37172	7.25172	7.24097	7.30878	7.19726	7.2164	7.18675	7.3266	7.37546	7.43021	7.29014	7.35467	7.36822
9630028B13Rik	319562	7.68137	7.63446	7.8569	7.67	7.807	7.67964	7.55782	7.62932	7.7615	7.86851	7.91684	7.5657	7.85988	7.73343	7.48598	7.68164
Xkr5	319581	7.3799	7.44461	7.34614	7.32782	7.49095	7.3671	7.42775	7.44601	7.33988	7.53723	7.52012	7.30938	7.27433	7.45637	7.31626	7.3765
Zfp653	319601	8.20528	8.2632	7.8052	7.9206	7.99819	7.938	8.13653	8.09633	8.18192	8.21962	7.92598	8.06963	7.95287	8.11426	7.92226	8.14471
Fam168a	319604	7.97368	7.80328	8.16931	7.94129	8.08577	7.98655	8.00335	7.94584	7.81562	8.01832	7.9753	7.9917	7.96849	7.60894	7.78845	7.76576
Rnf222	320040	7.27194	7.31518	7.18315	7.22829	7.33054	7.32711	7.31911	7.30323	7.39919	7.38273	7.1489	7.19531	7.27972	7.20118	7.27179	7.23293
Ccdc68	381175	7.71301	7.58241	7.54764	7.45967	7.47499	7.78249	7.72899	7.7282	7.50734	7.69971	7.38632	7.55002	7.3276	7.61314	7.71893	7.62618
Ndufs6	407785	14.8139	14.7756	14.5009	14.4345	14.5172	14.441	14.6141	14.5228	14.6979	14.8452	14.6976	14.5284	14.6827	14.5603	14.5181	14.6445
Iigp1b	435565	7.19793	7.18803	7.35164	7.34426	7.37482	7.31086	7.16965	7.20569	7.2185	7.14249	7.3053	7.3182	7.34414	7.29999	7.27954	7.31513
Thop1	50492	8.39654	8.3923	8.16297	8.15557	8.14327	8.07998	8.09736	8.11878	8.38434	8.37478	8.24469	8.23929	8.03377	8.16628	8.03031	8.03721
Lsm4	50783	12.2682	12.3871	12.3664	12.1835	12.2983	12.1804	12.46	12.6867	12.3467	12.3326	12.0935	12.1101	12.2719	12.495	12.428	12.5569
Nhp2	52530	8.53717	8.60738	8.89557	9.06944	9.09834	8.60161	8.55638	8.52087	8.59233	8.68469	8.89823	8.87375	8.98369	8.51665	8.54311	8.6846
Cisd1	52637	10.8663	10.8646	10.5872	10.712	10.3111	10.6208	10.5952	10.5738	10.8214	10.6616	10.5504	10.2348	10.5869	10.335	10.4357	10.291
Cd300lg	52685	9.82859	9.6836	9.0005	9.11765	8.7464	9.02962	9.36119	9.48693	9.65614	9.62505	9.1194	9.00652	9.22602	9.61893	9.35817	9.20931
Caprin1	53872	9.30768	9.46718	9.52989	9.61704	9.51195	10.0521	9.88619	9.80733	9.39889	9.50482	9.37574	9.65905	9.58139	9.95557	10.1304	9.82871
Stk19	54402	7.68988	7.81281	7.63834	7.57881	7.56594	7.64397	7.53704	7.62189	7.82211	7.49498	7.72394	7.68955	7.60736	7.7858	7.7377	7.75358
Pqbp1	54633	7.16727	7.10376	7.375	7.22298	7.29979	7.27743	7.17688	7.3243	7.25512	7.13769	7.12952	7.27513	7.29671	7.21002	7.31505	7.2597
Ccdc120	54648	7.61899	7.64938	7.50083	7.53157	7.7063	7.53033	7.69714	7.62978	7.51193	7.57452	7.68971	7.64442	7.68738	7.60421	7.63608	7.66028
Gtpbp2	56055	11.5515	11.3812	11.2432	10.9584	11.0981	11.0419	11.1665	11.2123	11.3766	11.3184	11.0731	11.1934	11.275	11.1724	11.0876	11.1904
Car5b	56078	7.33294	7.35708	7.5065	7.37502	7.501	7.4843	7.50464	7.35508	7.39802	7.34049	7.59634	7.48383	7.50804	7.40353	7.53209	7.62292
Prodh2	56189	7.2437	7.34934	7.37731	7.21691	7.38506	7.35407	7.35186	7.33924	7.49582	7.24344	7.41692	7.55288	7.31796	7.2281	7.34273	7.36822
Mpp5	56217	8.38021	8.32573	8.15705	7.99584	8.10819	7.87581	8.09525	7.87289	8.07881	8.13468	8.08941	7.9694	7.9008	7.84163	7.8995	7.85264
Styx	56291	11.0729	10.9025	10.728	10.7035	10.5841	10.5939	10.715	10.9031	10.8552	10.8523	10.6173	10.4017	10.5556	10.6957	10.6067	10.6418
Rbms2	56516	11.9496	11.889	11.4788	11.547	11.3855	11.4408	11.6863	11.7449	11.7845	11.8096	11.4895	11.5675	11.4873	11.7027	11.757	11.6167
Pfdn5	56612	11.4327	11.5196	11.3761	11.5068	11.6489	11.4652	11.3362	11.2756	11.4527	11.6226	11.5542	11.3893	11.6001	11.459	11.5138	11.5333
Lgi1	56839	8.08373	8.27135	8.10037	7.92104	8.02145	7.59411	7.72799	7.71894	8.26793	8.19508	7.91741	8.13551	7.99246	7.82461	7.67275	7.61359
Icmt	57295	9.26181	9.35992	9.13868	9.17825	8.95822	9.19902	9.37395	9.47841	9.17316	9.286	9.02734	9.18954	9.05892	9.43627	9.40028	9.16617
Hic2	58180	7.57685	7.59793	7.48514	7.64002	7.59028	7.48561	7.5815	7.56031	7.69892	7.4402	7.654	7.62954	7.66283	7.40602	7.51157	7.60938
Efemp2	58859	8.33623	8.46108	8.42828	8.59718	8.59863	8.6959	8.60996	8.62483	8.67998	8.41767	8.82618	8.5531	8.483	8.40709	8.65823	8.52417
Mcidas	622408	7.27194	7.28466	7.16012	7.20776	7.06777	7.28225	7.28757	7.23298	7.30093	7.23538	7.24622	7.27421	7.14239	7.25612	7.15574	7.2061
Rad54b	623474	7.63016	7.3593	7.92881	7.94173	8.01945	8.18031	8.00908	8.00388	7.81933	7.58371	7.95196	7.98086	7.93061	7.98036	8.24379	8.20898
Trim30e-ps1	625321	7.1949	7.24323	7.06047	7.1001	7.13692	7.04763	7.13754	7.18175	7.24203	7.05597	7.22636	7.14784	7.05137	7.17133	7.14616	7.15958
Syndig1l	627191	7.21253	7.28682	7.37035	7.23357	7.36211	7.34771	7.22076	7.30711	7.17953	7.41312	7.27935	7.22933	7.40786	7.36209	7.31142	7.41993
Herpud1	64209	11.3361	11.2294	11.2332	11.2866	11.1483	11.2872	10.9915	11.2075	11.2101	11.1528	11.2161	11.2192	11.0325	10.9059	11.0663	10.9365
Gng13	64337	7.47825	7.51777	7.41538	7.42071	7.47791	7.67924	7.67978	7.74833	7.57196	7.5162	7.32066	7.35531	7.48676	7.71331	7.70968	7.77527
Atp5d	66043	12.2956	12.4254	12.126	12.1297	12.1301	12.2469	12.3501	12.2809	12.4102	12.4338	12.1987	12.1156	12.1446	12.2963	12.1701	12.0547
Ethe1	66071	9.87153	10.0454	9.51231	9.61366	9.56544	9.64941	9.78939	9.76844	9.87675	9.95745	9.6477	9.59773	9.67925	9.89144	9.60141	9.646
Ndufa3	66091	13.4989	13.5774	13.4302	13.362	13.3652	13.3549	13.3559	13.4402	13.5841	13.6313	13.5955	13.3459	13.4025	13.3407	13.1197	13.3971
Ghitm	66092	9.26615	9.22673	9.5704	9.60786	9.34596	9.34364	9.21331	8.92331	9.12266	9.24249	9.37403	9.46823	9.28376	8.7235	8.95937	8.69487
Aaed1	66129	7.90317	7.93804	7.84513	7.87791	7.88491	7.57363	7.64987	7.64317	8.08482	7.96316	7.8149	7.8971	7.74535	7.79194	7.75869	7.7365
Tomm7	66169	10.8409	10.7304	10.8127	10.7551	10.8028	10.7397	10.6537	10.5523	10.8339	10.9679	10.7421	10.826	10.8605	10.5826	10.5727	10.4574
Nenf	66208	10.9521	10.932	11.007	11.0037	10.8176	10.5472	10.54	10.5398	10.8904	10.8209	11.206	10.8004	10.8945	10.5113	10.4245	10.4356
Osgep	66246	10.5938	10.8201	10.4217	10.4499	10.6096	10.2957	10.1667	10.2048	10.4103	10.5439	10.605	10.4655	10.4383	10.2438	10.1268	10.3207
Mrps21	66292	11.3279	11.3031	11.004	11.1704	11.0667	10.9148	11.0064	10.8504	11.3744	11.4403	10.9919	11.288	11.1477	10.9818	10.6512	10.9129
Riiad1	66353	9.46508	9.51232	8.93111	9.07046	8.95181	8.56849	8.72523	8.77235	9.31527	9.39985	9.11455	8.85821	8.9202	8.5633	8.56409	8.48944
Mgst3	66447	11.8751	11.9107	11.8564	11.9643	11.7427	11.5365	11.3821	11.3226	11.7005	11.7857	11.7681	11.8252	11.8715	11.3348	11.1746	11.2341
Pus3	67049	8.90838	8.71584	9.13256	9.31034	9.14326	8.66579	8.48718	8.6277	8.77718	8.97715	8.85579	9.0724	8.97004	8.62967	8.51393	8.51248
Ppid	67738	11.1936	10.8712	11.7477	11.4626	11.5314	11.1822	11.1019	11.0538	11.0054	11.0123	11.4727	11.5983	11.494	11.0588	11.1164	11.1708
Nudt12	67993	7.85291	8.0469	7.77188	7.90546	7.77892	7.71061	7.69307	7.75528	7.99149	7.97886	7.75869	7.87341	7.93297	7.78958	7.88913	7.7444
Tmem109	68539	11.3271	10.965	11.56	11.5669	11.3869	11.2956	11.2658	11.2372	10.9072	10.958	11.1533	11.3077	11.1792	10.6362	10.8479	10.5396
Dus1l	68730	8.78249	8.49587	8.83744	8.62301	8.70394	8.41314	8.27137	8.26763	8.53911	8.46748	8.5572	8.81783	8.483	8.15191	8.23232	8.1908
Rbfa	68731	10.9569	10.9213	10.767	10.4798	10.6836	10.4752	10.7195	10.5769	10.8795	10.8928	10.7777	10.5125	10.6804	10.604	10.486	10.5055
Cgrrf1	68755	9.69208	9.74554	9.58035	9.49594	9.51176	9.07828	9.26763	9.32954	9.61514	9.84691	9.593	9.49311	9.47157	9.33202	9.20344	9.17599
Trmu	72026	8.18548	8.3739	8.16478	8.10377	8.03096	7.86535	7.82823	7.86922	8.29024	8.19136	8.15738	8.15119	7.98735	7.93855	7.96561	7.83306
Cyp4f18	72054	7.36506	7.30205	7.96921	7.67676	8.05764	7.78094	7.63687	7.73084	7.45989	7.23538	7.92939	7.86524	7.96157	7.86436	7.83501	7.94641
Slc22a23	73102	8.13825	8.31014	8.19885	8.3808	8.17664	8.42552	8.53373	8.60932	7.96701	8.2068	8.15248	8.36736	8.30733	8.39502	8.34589	8.31362
Nfatc4	73181	9.09946	8.77279	8.73929	8.42468	8.53293	8.40154	8.4773	8.48221	8.88981	8.75905	8.54443	8.38799	8.59549	8.26846	8.29886	8.25677
Thoc3	73666	8.43438	8.49444	8.33508	8.15898	8.25713	8.14088	8.30971	8.16904	8.18606	8.41149	8.49848	8.32047	8.33451	8.09314	8.1978	8.19562
Ndufaf7	73694	8.94052	8.93004	8.42334	8.57578	8.46418	8.59299	8.75093	8.59952	8.89253	8.96394	8.53801	8.62849	8.62785	8.80901	8.55739	8.62368
Rnf6	74132	8.24869	8.21667	8.58718	8.38309	8.32082	8.23395	7.96455	7.96759	8.08631	8.24367	8.21865	8.11619	8.17338	7.7682	7.94405	7.78945
Josd1	74158	9.7066	10.0148	9.84678	9.94018	9.76251	9.89658	9.98126	10.1245	9.91978	9.97839	9.79866	9.81991	9.95864	9.97838	10.1112	10.1068
Samd4	74480	8.99017	8.98205	8.93973	8.77399	8.91052	8.40938	8.60775	8.56678	8.89137	8.89657	8.74614	8.69452	8.95686	8.46609	8.4764	8.38385
Fam53a	74504	11.9881	12.1197	11.5525	11.9916	11.5148	11.4292	11.668	11.7034	11.8256	11.8825	11.6096	11.8058	11.5743	11.7019	11.6561	11.6128
Hhatl	74770	11.2691	11.3933	10.1347	10.2661	10.2465	10.5705	10.7708	10.9336	10.9834	11.1041	10.288	10.2256	10.4829	10.8897	10.7321	10.4316
Rprd2	75137	7.59637	7.49286	7.58901	7.39457	7.54394	7.50388	7.5243	7.51201	7.39219	7.51303	7.3266	7.48609	7.58219	7.37375	7.50433	7.52912
Krt24	75706	7.1628	7.1484	7.19975	7.09286	7.24296	7.30168	7.25627	7.10445	7.10824	7.11832	7.09923	7.05033	7.22551	7.19793	7.25267	7.25483
Mnd1	76915	7.52757	7.66606	7.62077	7.55145	7.56252	7.68642	7.72195	7.86187	7.51537	7.65224	7.58853	7.65783	7.50726	7.61366	7.80241	7.69786
Fbxo34	78938	9.30647	9.15716	9.2328	9.2366	9.00753	9.44301	9.47359	9.44583	9.16166	9.15824	9.05211	9.30686	9.2137	9.3922	9.44082	9.46942
Hspb8	80888	10.9543	10.9888	11.9217	11.8949	11.8898	11.0095	11.0454	11.2513	10.9205	10.8967	11.7135	11.8784	11.8134	11.2819	11.2715	10.9811
Trim23	81003	8.96152	9.12132	8.94616	9.02591	8.91079	8.75147	8.95261	9.01319	8.8867	9.09799	8.97931	8.78215	8.89095	8.82482	8.85826	8.68537
Sil1	81500	8.32164	8.39646	8.3945	8.17595	8.23817	8.0827	8.09019	8.09848	8.23135	8.60338	8.41117	8.41246	8.40208	8.35929	8.1474	8.07914
Sf3b1	81898	7.18406	7.40366	7.20842	7.33058	7.27597	7.19924	7.2806	7.19233	7.12944	7.16484	7.14513	7.36543	7.19935	7.29438	7.19967	7.12932
Pcdhgb2	93700	7.45875	7.21187	7.37654	7.35708	7.41602	7.32323	7.25311	7.29672	7.42022	7.28806	7.27412	7.23298	7.40202	7.21795	7.32403	7.31255
Tmem132a	98170	8.42972	8.11814	8.11919	8.27887	8.37557	8.54498	8.78931	8.6117	8.23135	8.22326	8.37443	8.03903	8.33541	8.61205	8.58482	8.59752
Stk17b	98267	8.63958	8.72174	9.23037	9.16545	9.29629	9.37239	9.11404	9.44093	8.56048	8.78897	8.98071	9.18169	9.38386	9.3313	9.49494	9.48442
Fcrla	98752	7.31449	7.36262	7.375	7.27667	7.34684	7.55586	7.40636	7.4444	7.47499	7.47359	7.29323	7.74989	7.4482	7.67839	7.61063	7.79159
